1 Emily E. Mikucki<sup>1,\*</sup> and Brent L. Lockwood<sup>1</sup>

2 <sup>1</sup>Department of Biology, University of Vermont, Burlington, VT 05405, USA

3 \*Author for correspondence ([Emily.Mikucki@uvm.edu](mailto:Emily.Mikucki@uvm.edu))

4

5 Winter warming causes widespread shifts in the metabolome and hinders supercooling in *Pieris*  
6 *rapae* butterflies

7

8 **KEY WORDS: Cold tolerance, diapause, cryoprotectant, metabolomics**

9

10 **ABSTRACT**

11

12 Global climate change has the potential to devastate biological systems as organisms are exposed  
13 to novel temperature regimes. Increases in annual mean temperature have been accompanied by  
14 disproportionate rates of change in temperature across seasons, and winter is the season warming  
15 most rapidly. Yet, to our knowledge, no research has characterized the direct effects of winter  
16 warming on the biology of overwintering organisms. Here, we investigated the effects of winter  
17 warming stress on internal freezing temperatures (supercooling points) and metabolome profiles  
18 of diapausing *Pieris rapae* butterfly pupae. We show that after acute and chronic winter warming  
19 exposure, pupae had higher supercooling points and significant changes in metabolite  
20 abundances across the entire metabolome. Notably, there were warming-induced shifts in key  
21 biochemical pathways that likely support energy metabolism and cryoprotection. These  
22 physiological responses suggest that winter warming will threaten the survival of overwintering  
23 *P. rapae* pupae, and by extension winter warming may pose threats to other species that  
24 overwinter. Furthermore, we found evidence of local adaptation of supercooling in *P. rapae*, as  
25 we observed significantly lower supercooling points in Vermont individuals relative to North  
26 Carolina individuals. Moving forward, future research should focus on species-wide responses to  
27 winter warming events, particularly in the context of local warming patterns, to better predict  
28 how populations may differentially respond to changes in winter thermal environments.

29

30

31

## 32 INTRODUCTION

33

34 In the context of climate change, shifts in seasonality (i.e. later onset of winter and/or earlier  
35 onset of spring) and the increased frequency of temperature anomalies will expose organisms to  
36 unpredictable thermal environments to which they may not be adapted (García-Robledo et al.,  
37 2016; Kingsolver et al., 2011; Sinclair et al., 2016; Somero, 2010; Somero et al., 2017). Mean  
38 atmospheric winter temperatures are increasing at a faster rate than any other season (NOAA,  
39 <https://www.ncdc.noaa.gov/sotc/national/202001>, accessed February 2020; NOAA,  
40 <https://www.ncdc.noaa.gov/cag/>, accessed February 2020). Additionally, according to the latest  
41 IPCC special report, winter temperatures have shown continued patterns of increased variability  
42 with both hotter mean temperatures and a higher frequency of extreme temperatures and weather  
43 events (Allen et al., 2019). These winter-specific warming patterns have the potential to  
44 adversely affect the overwintering physiology of animals that enter hibernation, torpor or  
45 diapause (Bale and Hayward, 2010; Bradshaw et al., 2010; Hahn and Denlinger, 2007). Thus, it  
46 is imperative to characterize how overwintering organisms respond to winter warming conditions  
47 in order to predict how these species will respond to future climate conditions.

48         Temperate species of insects that enter diapause in the winter may be vulnerable to winter  
49 warming, as environmental temperature and seasonality can impact their physiology (Colinet et  
50 al., 2015; Sinclair et al., 2016). Indeed, even subtle changes in temperature can have major  
51 consequences on diapause development and subsequent spring eclosion success (Lehmann et al.,  
52 2018). Warmer pre-wintering temperatures led to greater expenditure of energetic reserves and  
53 an increase in yearly winter mortality in overwintering bees (*Osmia lignaria*) (Sgolastra et al.,  
54 2011). Similarly, variable temperature during autumn led to higher susceptibility of energy store  
55 loss in diapausing *Erynnis propertius* larvae, making this species, and other dormant ectothermic  
56 insects potentially vulnerable to metabolic activity shifts through diapause (Williams et al.,  
57 2012). Moreover, when adult blowflies (*Calliphora vicina*) were exposed to warmer autumn  
58 conditions (+5°C) during diapause induction, the subsequent larvae that entered diapause had  
59 lowered cold hardiness, compromised supercooling points (internal freezing point), and  
60 decreased survival (Coleman et al., 2014).

61         Diapause is an overwintering strategy that relies on intrinsic physiological mechanisms  
62 that depress metabolic activity and confer cold tolerance (Denlinger, 2002; Salt, 1961; Saunders,

63 1971; Tauber and Tauber, 1978). A key trait that underlies cold tolerance during diapause is  
64 enhanced supercooling (Storey and Storey, 1988), which is the ability of organisms to lower the  
65 freezing point of their body solutions to below 0°C (Somero et al., 2017). Supercooling is  
66 achieved, at least in part, by manipulating the colligative properties of intra- and extra-cellular  
67 solutions through the synthesis and accumulation of cryoprotectant metabolites (Storey and  
68 Storey, 1988; Storey and Storey, 1991). For example, larvae of the arctic beetle *Cucujus clavipes*  
69 have been observed to withstand temperatures of -100°C without freezing, which is largely made  
70 possible by the synthesis and accumulation of high concentrations of glycerol (4-6 mol L<sup>-1</sup>) in  
71 their body solutions (Sformo et al., 2010).

72 Despite the intrinsic physiological mechanisms that enable diapausing insects to survive  
73 through months of extreme winter conditions, extrinsic factors such as temperature may  
74 influence diapause as well. Indeed, successful overwintering may depend on cold temperatures to  
75 maintain metabolic homeostasis (Hodek and Hodkova, 1988). The Arrhenius relationship, which  
76 describes the effect of temperature on the rate of chemical reactions, predicts that increases in  
77 temperature will lead to exponential increases in the rates of biochemical reactions (Somero et  
78 al., 2017). Thus, if dormant animals rely on cold winter temperatures as a means to extrinsically  
79 regulate their physiological processes (Hodek and Hodkova, 1988; Storey et al., 2010), winter  
80 warming could lead to increases in biochemical activity that compromise their ability to survive.  
81 As a consequence, winter warming may cause diapausing insects to expend energy stores before  
82 spring emergence (Buckley et al., 2017) or to undergo shifts in metabolism that alter  
83 cryoprotective mechanisms like supercooling.

84 *Pieris rapae*, or the cabbage white butterfly, is a globally abundant species with  
85 populations found across five continents, providing a model system to study the effects of winter  
86 warming patterns on populations of temperate diapausing insect species (Ryan et al., 2019).

87 *Pieris rapae* diapause and overwinter in the pupal stage, and previous work has shown that North  
88 American (Ontario, Canada) *P. rapae* pupae can supercool to below -20°C and that supercooling  
89 point depends on thermal acclimation (Li et al., 2020). In addition, populations of *P. rapae* from  
90 Canada and Eastern Siberia differ in the responses of supercooling to thermal acclimation,  
91 suggesting genetic variation among populations in the plasticity of this trait (Li et al., 2020).

92 Although previous work has established the connection between the thermal environment  
93 and overwintering physiology, no studies have characterized concurrent responses in

94 supercooling and metabolomic profiles to winter warming. Thus, the extent to which winter  
95 warming will alter the intrinsic mechanisms of cold tolerance, which may threaten the survival of  
96 overwintering organisms, cannot be predicted. To address this gap in knowledge, we tested  
97 whether increases in temperature, which approximate current and future winter warming  
98 scenarios, influence the overwintering physiology of *P. rapae* butterflies. Specifically, we  
99 predicted that higher temperature experienced during diapause would adversely affect the ability  
100 for *P. rapae* pupae to supercool, and that these responses in supercooling would be underlined by  
101 changes in metabolite abundances across the metabolome. Importantly, we characterized  
102 metabolomic profiles of pupae from which we also measured supercooling points, allowing us to  
103 directly correlate metabolomes to supercooling. Overall, our results suggest that diapausing *P.*  
104 *rapae* pupae exposed to either chronic or acute winter warming patterns may experience adverse  
105 effects on their overwintering physiology, particularly if winter temperatures continue to rise and  
106 have increased variability. The results from this research will provide ecologically relevant  
107 insight into the future of overwintering physiology, as we continue to understand the effects of  
108 winter warming at local scales, as well as global warming patterns, across seasons.

109

110

## 111 **MATERIALS AND METHODS**

112

### 113 **Adult butterfly collections and maintenance**

114 We collected approximately 40-50 male and female adult *Pieris rapae* butterflies in mid to late  
115 September in 2017 at two locations in northwestern Vermont at least 15 miles apart  
116 (44°29'48.52"N, 73°1220.19"W and 44°17'10.07"N, 73°14'07.11"W). Adult *P. rapae*  
117 butterflies were collected from two locations in North Carolina (35°36'19.47"N, 82°20-07.25"W  
118 and 35°36'31.57"N, 82°26'31.33"W). After collection, we kept adults in mesh containers  
119 (Carolina Biological Supply, 11" diameter × 12" height) with 10 butterflies in each container  
120 under common garden conditions of 24°C, 12:12 Light:Dark photoperiod, 55% relative  
121 humidity, and with direct access to sunlight. We fed adults a diet of 10% honey solution on a  
122 sponge every 24 hours. After 48 hours post-collection, we isolated females in individual mesh  
123 containers, and gave them fresh organic kale leaves on which to oviposit. Fertilized eggs were  
124 collected every 24 hours, and placed into common garden juvenile rearing conditions.

125

### 126 **Juvenile stage rearing and diapause induction**

127 Upon oviposition, eggs were removed and placed into plastic containers (35.6cm length x  
128 20.3cm wide x 12.4cm height) and into incubators (Percival model DR-36VL) set to 24°C and  
129 55% relative humidity, with approximately 20 eggs in each container. *Pieris rapae* diapause in  
130 the pupal stage, with the larval stage as the sensitive stage or preparative stage (Richards 1940).  
131 To ensure all individuals entered diapause, we subjected all individuals to short-day  
132 photoperiods (8L:16D) starting at the embryonic stage. We replaced fresh organic kale leaves  
133 every day. Upon pupation, roughly 14 days post oviposition, we placed individuals into one of  
134 three winter warming treatments, ensuring that eggs from each female were represented in each  
135 treatment.

136

### 137 **Winter warming treatments in diapausing pupae**

138 We determined the winter warming treatments based from the historic data records of a local  
139 weather station in Burlington, VT (National Weather Service Forecast Office,  
140 [https://w2.weather.gov/climate/local\\_data.php?wfo=btv](https://w2.weather.gov/climate/local_data.php?wfo=btv), accessed February 2020). These  
141 patterns reflect historic, concurrent and predicted chronic and acute warming patterns observed  
142 in Vermont winters (December-February). We isolated individual pupae into petri dishes (60 x  
143 15mm) and kept them under one of the following conditions until Day 90 of pupal diapause or  
144 supercooling analysis (measured on Days 25, 50 and 75). The three temperature conditions  
145 consisted of a control treatment, chronic warming treatment, or acute warming treatment. We  
146 kept control individuals under a temperature regime with daily fluctuating temperature 4°C-8°C,  
147 representing autumn temperatures when individuals first enter diapause. We kept control  
148 individuals under this regime for the entire experiment. We kept the chronic warming individuals  
149 under a temperature regime of 7°C-11°C, representing a 3°C increase from the control. This  
150 pattern reflects both the long-term degree of warming pattern seen in Vermont over the last 50  
151 years, as well as the predicted, continued pattern we expect to see over the next 50 years  
152 (National Weather Service Forecast Office,  
153 [https://w2.weather.gov/climate/local\\_data.php?wfo=btv](https://w2.weather.gov/climate/local_data.php?wfo=btv), accessed February 2020). We kept the  
154 acute warming individuals under the control conditions of daily fluctuating 4°C-8°C but with  
155 three, 24-hour warming events of fluctuating 18°C-23°C on days 25, 50 and 75. This temperature

156 regime mimics the hottest recorded diurnal and nocturnal temperatures observed in Vermont  
157 winters (National Weather Service Forecast Office,  
158 [https://w2.weather.gov/climate/local\\_data.php?wfo=btv](https://w2.weather.gov/climate/local_data.php?wfo=btv), accessed February 2020). To measure  
159 standing population-level differences in diapause physiology, we only subjected individuals from  
160 North Carolina to the control treatment, thus, comparing them to the Vermont control treatment.

161 We weighed individual pupae every 2-4 days using a fine-scale balance to determine any  
162 differences in weight over the course of the 90-day experiment (Mettler Toledo XSE105). We  
163 report no statistical differences in weight over time for any of the three treatments (Type II  
164 ANOVA,  $F_{1,41}=1.62$ ,  $P=0.21$ ), and thus, we excluded weight as a factor in future analyses.

165

### 166 **Supercooling point measurement**

167 We took a final weight measurement of each individual prior to the internal freezing temperature  
168 analysis. We measured the internal freezing temperature or supercooling point (SCP) of the  
169 diapausing pupae based off the protocols described in Boychuk et al. (2015) and Sinclair et al.  
170 (2015) (Boychuk et al., 2015; Sinclair et al., 2015). To determine SCP, we placed pupae into  
171 individual 2-ml microcentrifuge tubes, attached to a type-K thermocouple wire (OMEGA  
172 Engineering), and then sealed it with parafilm. We equilibrated individuals in a circulating water  
173 bath (Polyscience PP15R-30) with Polycool HC -50 anti-freeze liquid, then kept individuals at  
174 0°C for 10 minutes, and then cooled them from 0°C to -30°C at a rate of 0.5°Cmin<sup>-1</sup>. We  
175 monitored body temperature using a thermometer and data logger program (OMEGA  
176 Engineering HH806AW). SCP was defined as the temperature at which intracellular ice formed,  
177 and was measured as the lowest temperature (°C) recorded before the detectable presence of an  
178 exothermic reaction (ice formation) in the temperature trace. We analyzed individual internal  
179 freezing temperatures on Days 25, 50 and 75 in the control (Vermont and North Carolina) and  
180 chronic warmed individuals, and 24-hours post-warming in the acute warmed (STA) individuals.  
181 We measured 4-7 individuals for each temperature by treatment combination. Immediately after  
182 SCP analysis, we flash froze control and chronic warmed individuals in liquid nitrogen and  
183 preserved them at -80°C for metabolomics analysis.

184 We compared supercooling points of (1) control vs. chronic warmed, (2) control vs. acute  
185 warmed, and (3) Vermont vs. North Carolina populations (under control conditions) with a 2-  
186 way analysis of variance (ANOVA). We ran weight as a factor in the ANOVA for supercooling

187 point, but as stated above, it wasn't a significant factor, so we re-ran the ANOVA as a 2-way  
188 reduced model. We modeled treatment, or population, and days in diapause as fixed effects. All  
189 supercooling point analyses were performed using GraphPad Prism 8.

190

### 191 **Global metabolomics sample preparation**

192 We used individual pupae preserved from the supercooling point analysis for global, untargeted  
193 metabolomics analysis. For this analysis, we only used control and chronic warmed individuals  
194 (n=17 pupae per group) with at least 4 individuals represented at each timepoint (Days 25, 50  
195 and 75). All samples were sent to the University of Florida Southeast Center for Integrated  
196 Metabolomics facility for analysis.

197 Samples were homogenized in 100  $\mu$ L 5mM ammonium acetate and protein  
198 concentration of each sample homogenate was measured. All samples were normalized to 500  
199  $\mu$ g/mL protein concentration prior to extraction. Note that because samples were normalized to  
200 equal concentrations prior to metabolomics analysis, we did not normalize metabolite  
201 abundances to pupal weights. Extraction was performed using protein precipitation. Briefly, 50  
202  $\mu$ L normalized homogenate was spiked with a mixture of internal standard. Proteins were  
203 precipitated by adding 400  $\mu$ L of 8:1:1 acetonitrile:methanol:acetone. After mixing, proteins  
204 were allowed to precipitate for 15 min at 4°C. Supernatant from each sample was collected  
205 following centrifugation at 20,000xg for 10 min and dried under a gentle stream of nitrogen at  
206 30°C. Samples were reconstituted with 50  $\mu$ L of reconstitution solution consisting of injection  
207 standards and transferred to LC-vials for analysis.

208

### 209 **LC-MS analysis and data processing**

210 Untargeted metabolomics analysis was performed on a Thermo Q-Exactive Orbitrap mass  
211 spectrometer with Dionex UHPLC and autosampler. All samples were analyzed in positive and  
212 negative heated electrospray ionization with a mass resolution of 35,000 at m/z 200 as separate  
213 injections. Separation was achieved on an ACE 18-pfp 100 x 2.1 mm, 2  $\mu$ m column with mobile  
214 phase A as 0.1% formic acid in water and mobile phase B as acetonitrile. The flow rate was 350  
215  $\mu$ L/min with a column temperature of 25°C. Injection volume was 2  $\mu$ L.

216 MZmine 2.0 was used to identify features, deisotope, align features and perform gap  
217 filling to fill in any features that may have been missed in the first alignment algorithm. All

218 adducts and complexes were identified and removed from the data set. This rendered a total of  
219 14,379 features, which we analyzed for significant responses to winter warming (see below). We  
220 used MetaboAnalyst 4.0 (Chong et al., 2019) to normalize the mass spec peak intensities of  
221 metabolite features prior to statistical analyses. For each feature, peak intensity was log-  
222 transformed and normalized to the sample median. The data were auto-scaled to facilitate  
223 comparison among features.

224

### 225 **Statistical analysis of metabolomic data**

226 We compared the normalized peak intensities, as a proxy for metabolite abundance, of all  
227 metabolite features identified by LC-MS in the control and chronic warmed pupae. We  
228 conducted a principal components analysis to describe the major axes of variation in the dataset.  
229 We then tested whether the first principal component (PC1) significantly explained variation in  
230 supercooling point among the samples via least-squares linear regression. We then measured the  
231 number of metabolites with significantly different peak intensities via Type II 2-way ANOVA,  
232 with warming treatment and days in diapause modeled as fixed effects. Features in the positive  
233 and negative ion modes were analyzed separately. All p-values were corrected for false  
234 discovery via the Benjamini-Hochberg method (Benjamini and Hochberg, 1995). All metabolite  
235 features with an FDR < 0.05 were considered to have significantly different abundances. Unless  
236 otherwise indicated, we performed all statistical analyses using GraphPad Prism 8 or R version  
237 3.6.1.

238

### 239 **Metabolite annotation and pathway analysis**

240 We used the MS Peaks to Pathways module in MetaboAnalyst 4.0 (Chong et al., 2019) to  
241 annotate metabolome features and to conduct pathway analysis. Accurate annotation of  
242 untargeted metabolomics data is dependent upon a library of verified standards, which are often  
243 incomplete and not representative of the focal species (Li et al., 2013). The MS Peaks to  
244 Pathways approach subverts these shortcomings by identifying metabolite sets in the context of  
245 KEGG pathways. Metabolite annotation of features is based upon the mass-to-charge ratios in  
246 the context of pathways, whose compounds are found to respond in a coordinated manner to  
247 experimental manipulation (i.e., winter warming). Because the goal of this study was to assess  
248 the physiological consequences of winter warming, we focused our pathway analysis and



249 metabolite annotation on the features that were identified to change in abundance in response to  
250 chronic warming. We conducted the GSEA algorithm in the MS Peaks to Pathways module of  
251 MetaboAnalyst 4.0, which is a rank-based pathway enrichment test. Metabolite features were  
252 ranked based on the F-value from the treatment main effect from the 2-way ANOVA (see  
253 above). We used the *Drosophila melanogaster* KEGG pathway database, which is the only insect  
254 species for which KEGG pathway information is available, to identify significantly enriched  
255 pathways and metabolites in our dataset. Pathways with an FDR-corrected P-value less than 0.1  
256 were considered significant, following the recommendations of the authors of the analysis  
257 software.

258

## 259 **RESULTS**

260

### 261 **Supercooling point: effects of winter warming and population of origin**

262 Winter warming caused shifts in supercooling point. Chronic and acute winter warming caused  
263 significantly higher supercooling points in pupae on day 50 (Fig. 1A; 2-way ANOVA,  
264  $F_{2,43}=6.566$ ,  $P=0.0032$ ; Dunnett's multiple comparison test, Day 50 – control vs. acute warming,  
265  $P=0.0070$ , control vs. chronic warming,  $P=0.0079$ ). Supercooling point continuously decreased  
266 in Vermont control individuals over 75 days in diapause with the lowest observed, average  
267 supercooling points ( $\bar{x} = -26.3 \pm 0.3^{\circ}\text{C}$ ) on Day 75 (Fig. 1A; 2-way ANOVA, day factor,  
268  $F_{2,43}=19.43$ ,  $P<0.0001$ ). In both the acute warming and chronic warming groups, supercooling  
269 point increased from day 25 to day 50 (Day 25 acute warming  $\bar{x} = -21.0 \pm 2.2^{\circ}\text{C}$  and chronic  
270 warming  $\bar{x} = -20.7 \pm 3.4^{\circ}\text{C}$  to Day 50 acute warming  $\bar{x} = -19.6 \pm 3.9^{\circ}\text{C}$  and chronic warming  $\bar{x} =$   
271  $-19.2 \pm 3.1^{\circ}\text{C}$ ). However, supercooling points decreased again in the warmed groups by Day 75  
272 with little standard deviation, mirroring the control group (acute warming  $\bar{x} = -25.3 \pm 2.9^{\circ}\text{C}$  and  
273 chronic warming  $\bar{x} = -25.6 \pm 1.0^{\circ}\text{C}$ ) (Fig. 1A).

274

**Figure 1**

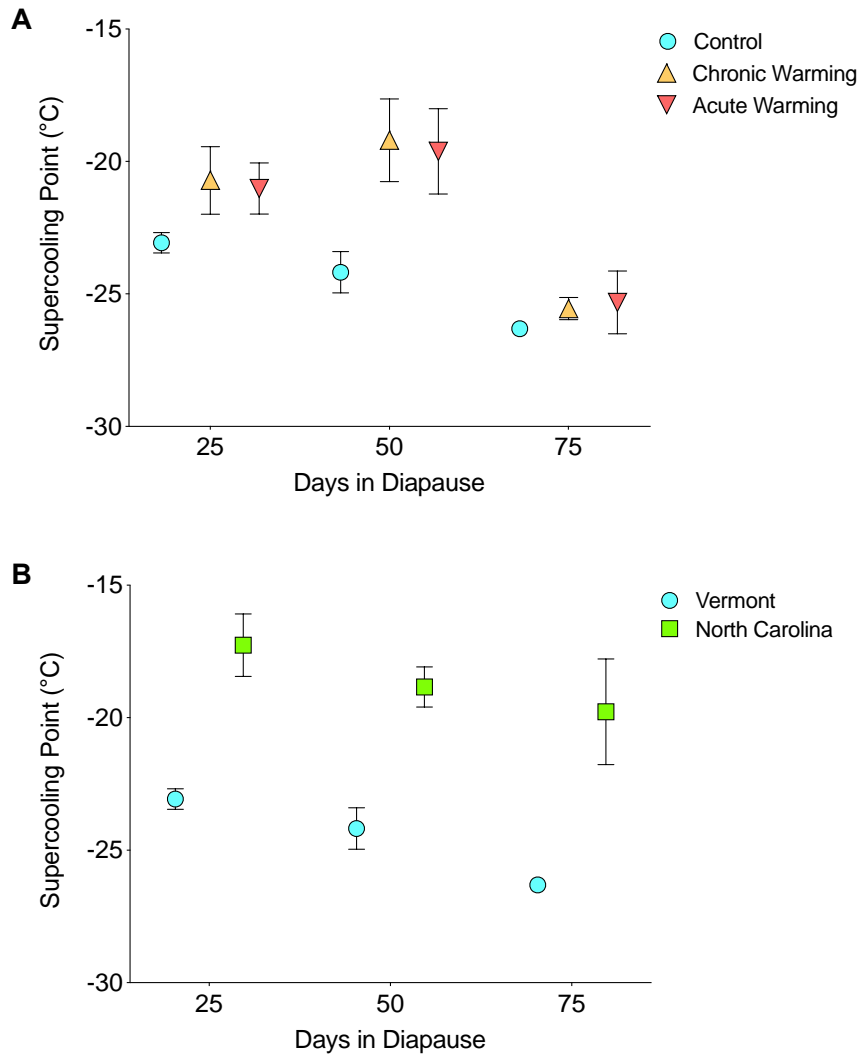

275

276 **Figure 1. Supercooling points (SCP) of diapausing *Pieris rapae* pupae exposed to winter**  
277 **warming conditions and from Vermont and North Carolina populations.** (A) SCPs (internal  
278 freezing temperature) were higher in pupae exposed to winter warming (2-way ANOVA;  
279 temperature factor,  $F_{2,43}=6.566$ ,  $P=0.0032$ ; day factor,  $F_{2,43}=19.43$ ,  $P<0.0001$ ; temperature x day  
280 interaction,  $F_{4,43}=1.217$ ,  $P=0.3176$ ; post-hoc Dunnett's multiple comparison test (Day 50 –  
281 control vs. acute warming ( $P=0.0070$ ), control vs. chronic warming ( $P=0.0079$ ). Diapausing  
282 pupae were exposed to one of three temperature treatments: control (4-7°C, n=18), acute  
283 warming (18-23°C, n=17), or chronic warming (7-11°C, n=17). SCP was measured on Days 25,  
284 50, and 75 after diapause induction for the control and chronic warmed pupae, and 24-hr post

285 warming (Days 26, 51, and 76) for the acute warmed individuals. SCP is presented as mean  
286 freezing temperature ( $^{\circ}\text{C}$ )  $\pm$  standard error of the mean, error bars for control individuals at Day  
287 75 too small to be visible. (B) SCPs (internal freezing temperature) were higher in pupae from  
288 North Carolina (2-way ANOVA; population factor,  $F_{1,26}=67.35$ ,  $P<0.0001$ ; day factor,  
289  $F_{2,26}=5.459$ ,  $P=0.0105$ ; population x day interaction,  $F_{2,26}=0.2307$ ,  $P=0.7956$ ). Diapausing pupae  
290 were exposed to control temperature regime (4-7 $^{\circ}\text{C}$ ) Vermont (n= 18) and North Carolina  
291 (n=14). SCP was measured on Days 25, 50, and 75 after diapause induction. SCP is presented as  
292 mean freezing temperature ( $^{\circ}\text{C}$ )  $\pm$  standard error of the mean, error bars for control individuals at  
293 Day 75 too small to be visible.

294

295 Supercooling points matched local environmental conditions in Vermont and North  
296 Carolina. Supercooling point was significantly lower (more negative) in Vermont individuals  
297 than North Carolina individuals across all three timepoints (Fig. 1B; 2-way ANOVA; population  
298 factor,  $F_{1,26}=67.35$ ,  $P<0.0001$ ; day factor,  $F_{2,26}=5.459$ ,  $P=0.0105$ ; population x day interaction,  
299  $F_{2,26}=0.2307$ ,  $P=0.7956$ ). Interestingly, supercooling point reached an average of  $-26.3 \pm 0.3^{\circ}\text{C}$   
300 among Vermont pupae and  $-19.8 \pm 4.0^{\circ}\text{C}$  among North Carolina pupae at day 75, which  
301 corresponds to the disparate extreme low temperatures in these two locations—average extreme  
302 minimum temperatures in VT and NC are  $-29$  to  $-26^{\circ}\text{C}$  and  $-18$  to  $-15^{\circ}\text{C}$ , respectively (USDA,  
303 <https://planthardiness.ars.usda.gov/>, accessed February 2020). Although both populations  
304 depressed their internal freezing temperature over time, the Vermont pupae were able to depress  
305 their internal freezing to significantly lower temperatures than the North Carolina pupae (Fig.  
306 1B, 2-way ANOVA, population factor,  $F_{1,26}=67.35$ ,  $P<0.0001$ ).

307

### 308 **Responses of the metabolome to winter warming**

309 Untargeted metabolomics identified a total of 14,379 metabolite features in all pupae from the  
310 control and chronically warmed experimental groups. Of these, 1,370 showed significant  
311 changes in abundance (normalized peak intensity) through diapause, irrespective of winter  
312 warming treatment (2-way ANOVA, day factor,  $\text{FDR} < 0.01$ ). 443 features showed significant  
313 changes in abundance in response to chronic winter warming (2-way ANOVA, temperature  
314 factor,  $\text{FDR} < 0.01$ ), and 16 features showed significant changes in abundance through diapause  
315 and in response to warming. No features had abundances that depended on the interaction

316 between day and treatment (2-way ANOVA, day x temperature interaction, all features had an  
317 FDR > 0.24).

318 Metabolomes were strongly correlated to supercooling point (Fig. 2). A principal  
319 components analysis of metabolite feature abundances revealed that pupae cluster primarily by  
320 supercooling point, accounting for nearly 27% of the total variation in abundances of all 14,379  
321 features among pupae (Fig. 2A). In addition, 10% of the total variation in metabolomes accounts  
322 for differences among pupae by days in diapause (Fig. 2A). Moreover, the variation among  
323 metabolomes, as described by PC1, was strongly correlated to supercooling point (Fig. 2B;  
324 Least-squares linear regression of PC1 on SCP,  $y = -15.48x - 23.3$ ,  $R_2=0.73$ ,  $P<0.00001$ ).

**Figure 2**

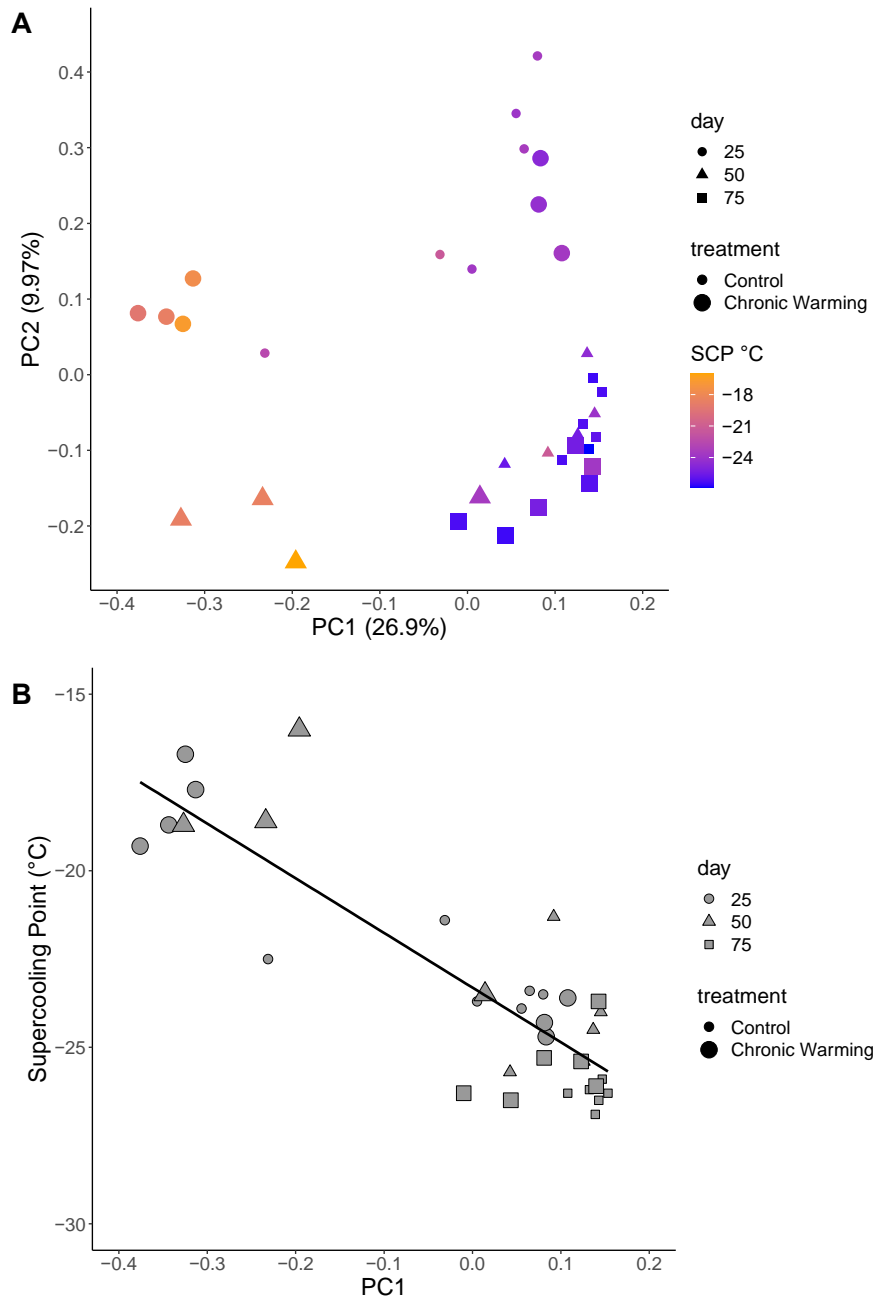

325

326 **Figure 2. Whole metabolomes cluster by supercooling point (SCP) and days in diapause.**

327 (A) Principal components analysis of normalized intensities of 14,379 metabolite features among

328 34 pupae. Each point represents the metabolome of an individual pupa, collapsed in principal

329 component space for the first two principal components that describe 37% of the variation

330 among metabolomes. 26.9% of the variation in metabolomes (PC1) separates pupae by SCP, and

331 9.97% of the variation (PC2) separates pupae by days in diapause. Day in diapause is indicated  
332 by shape, warming treatment is indicated by size, and SCP is indicated by color. (B) Variation  
333 among metabolomes is strongly correlated to supercooling point (SCP) (Least-squares linear  
334 regression of PC1 on SCP,  $y = -15.48x - 23.3$ ,  $R_2=0.73$ ,  $P<0.00001$ ). Day in diapause is  
335 indicated by shape and warming treatment is indicated by size.

**Figure 3**

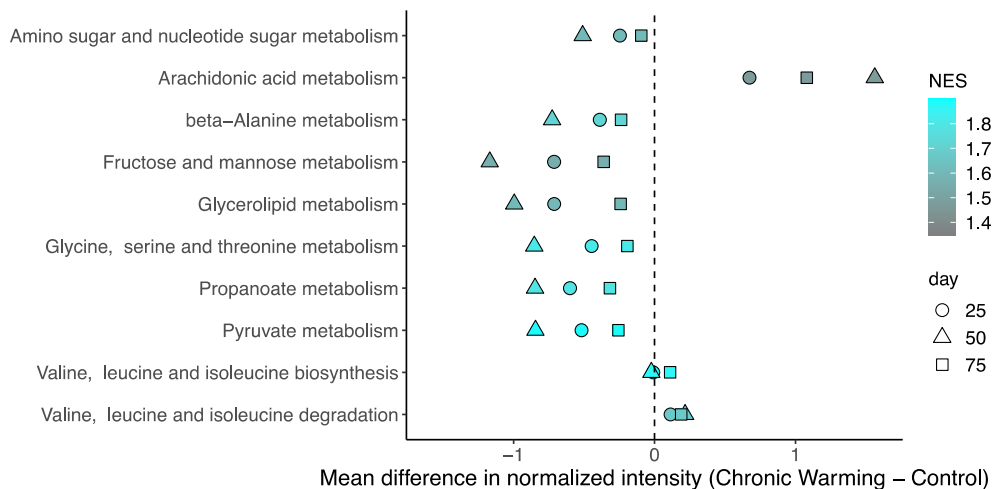

336  
337 **Figure 3: Pathways significantly changed in response to winter warming.** Plotted are the  
338 mean differences in normalized intensity (Chronic warmed – Control), averaged among all  
339 features in a given pathway and among pupae in a given day in diapause, for 10 pathways whose  
340 member KEGG compounds showed significant differences in normalized intensity in winter-  
341 warmed pupae. Represented in the 10 pathways are 153 features that mapped to 81 annotated  
342 KEGG compounds. Positive values (x-axis) indicate higher abundances of metabolites in  
343 warmed pupae, and negative values indicate lower abundances in warmed pupae, relative to  
344 controls. Days in diapause are indicated by the shapes, and normalized enrichment score (NES)  
345 is indicated by the color scale. Pathways with higher NES reflect greater proportions of  
346 metabolites that were found to be overrepresented in the pathway enrichment analysis. Pathways  
347 are listed in alphabetical order.

348

349 The coordinated changes in the metabolome that accompanied the winter warming treatment  
350 were found to coincide with significant changes within 10 biochemical pathways (Fig. 3; Table

351 S1). Overwhelmingly, winter warming caused the abundances of metabolites in most (7 out of  
352 10) of these pathways to decrease. Meanwhile, one pathway (arachidonic acid metabolism)  
353 showed increases in the abundance of its metabolites. Two pathways (valine, leucine and  
354 isoleucine biosynthesis and valine, leucine and isoleucine degradation) showed both increases  
355 and decreases in metabolite abundances, and thus these two pathways did not exhibit  
356 directionality in winter-warming-induced changes overall (Fig. 3). Interestingly, three of the  
357 pathways— $\beta$ -alanine metabolism, fructose and mannose metabolism, and glycine, serine and  
358 threonine metabolism—implicate the involvement of previously described cryoprotectants,  
359 including  $\beta$ -alanine, sorbitol, and glycine (Michaud and Denlinger 2007; Lee 2010; Hahn and  
360 Denlinger 2011).  
361

**Figure 4**

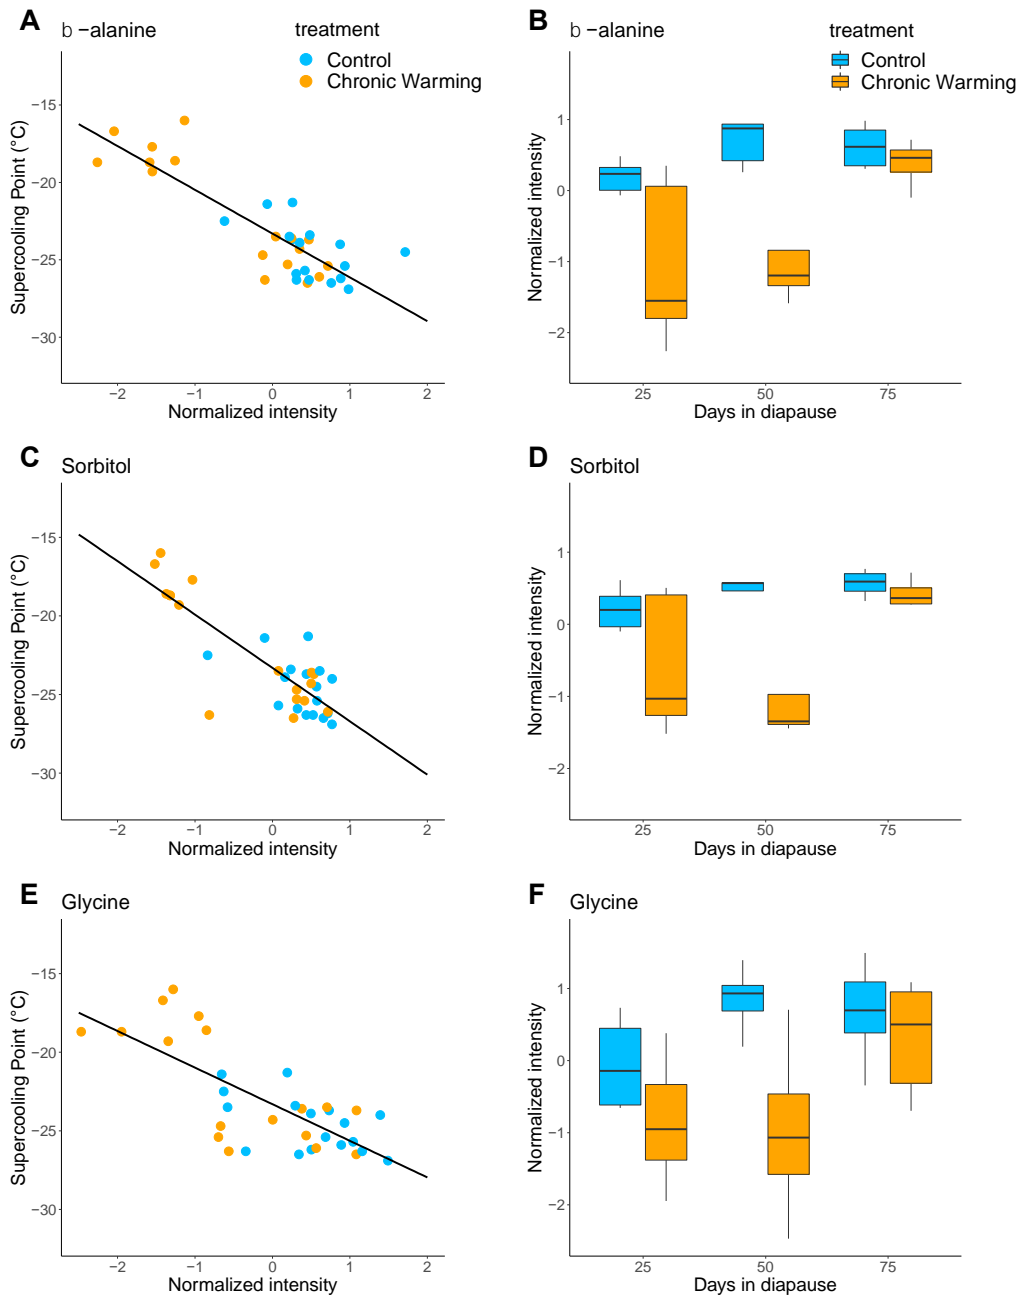

362

363

364 **Figure 4: Abundances of putative cryoprotectant metabolites were negatively correlated**  
365 **with supercooling point and reduced after winter warming.**

366 (A)  $\beta$ -alanine normalized intensity was negatively correlated with SCP (Least-squares linear

367 regression,  $y = -2.83x - 23.31$ ,  $R^2 = 0.72$ ,  $P < 0.00001$ ). (B)  $\beta$ -alanine normalized intensity was



368 reduced after warming (2 way-ANOVA; temperature factor,  $F_{1,30} = 17.16$ ,  $P = 0.0003$ ; day  
369 factor,  $F_{1,30} = 12.00$ ,  $P = 0.002$ ; temperature x day interaction,  $F_{1,30} = 2.34$ ,  $P = 0.14$ ). (C)  
370 Sorbitol normalized intensity was negatively correlated with SCP (Least-squares linear  
371 regression,  $y = -3.4x - 23.31$ ,  $R_2 = 0.70$ ,  $P < 0.00001$ ). (D) Sorbitol normalized intensity was  
372 reduced after warming (2 way-ANOVA; temperature factor,  $F_{1,30} = 11.11$ ,  $P = 0.002$ ; day factor,  
373  $F_{1,30} = 5.84$ ,  $P = 0.02$ ; temperature x day interaction,  $F_{1,30} = 0.10$ ,  $P = 0.62$ ). (E) Glycine  
374 normalized intensity was negatively correlated with SCP (Least-squares linear regression,  $y = -$   
375  $2.33x - 23.31$ ,  $R_2 = 0.55$ ,  $P < 0.00001$ ). (F) Glycine normalized intensity was reduced after  
376 warming (2 way-ANOVA; temperature factor,  $F_{1,30} = 11.36$ ,  $P = 0.002$ ; day factor,  $F_{1,30} = 4.52$ ,  
377  $P = 0.02$ ; temperature x day interaction,  $F_{1,30} = 2.30$ ,  $P = 0.12$ ). Data represent mean normalized  
378 intensity of all features that matched a given metabolite ( $\beta$ -alanine: 3 features, sorbitol: 11  
379 features, glycine: 1 feature).

380

### 381 **Responses of putative cryoprotectants to winter warming**

382 Pupae with the lowest supercooling points had the highest abundances of three putative  
383 cryoprotectants,  $\beta$ -alanine, sorbitol, and glycine, and SCP was negatively correlated with the  
384 abundances of all of these metabolites (Fig. 4; Least-squares linear regression;  $\beta$ -alanine,  $R_2 =$   
385  $0.72$ ,  $P < 0.00001$ ; sorbitol,  $R_2 = 0.70$ ,  $P < 0.00001$ ; and glycine,  $R_2 = 0.55$ ,  $P < 0.00001$ ).  
386 Moreover, all three of these metabolites showed significant decreases in abundance after chronic  
387 winter warming (Fig. 4; 2-way ANOVA, temperature main effect;  $\beta$ -alanine,  $F_{1,30} = 17.16$ ,  $P =$   
388  $0.0003$ ; sorbitol,  $F_{1,30} = 11.11$ ,  $P = 0.002$ ; and glycine,  $F_{1,30} = 11.36$ ,  $P = 0.002$ ).

389

390

391

392

393

394

395

396

397

398

399 **Supplemental Tables**

400

401 **Table S1. KEGG pathways significantly enriched in the metabolomic response to winter**  
402 **warming (MS Peaks to Pathways, MetaboAnalyst)(Chong et al. 2019).**

403

| <b>Pathway</b>                              | <b>Total<br/>Compounds</b> | <b>Compounds<br/>in Dataset</b> | <b><i>P-val</i></b> | <b>Adjusted<br/><i>P-val</i></b> | <b>NES</b> |
|---------------------------------------------|----------------------------|---------------------------------|---------------------|----------------------------------|------------|
| Glycine, serine and threonine metabolism    | 25                         | 17                              | 0.010               | 0.079                            | 1.81       |
| Amino sugar and nucleotide sugar metabolism | 34                         | 20                              | 0.010               | 0.079                            | 1.607      |
| Pyruvate metabolism                         | 24                         | 15                              | 0.010               | 0.079                            | 1.885      |
| Fructose and mannose metabolism             | 18                         | 13                              | 0.010               | 0.079                            | 1.562      |
| beta-Alanine metabolism                     | 13                         | 8                               | 0.011               | 0.079                            | 1.724      |
| Valine, leucine and isoleucine degradation  | 35                         | 10                              | 0.011               | 0.079                            | 1.676      |
| Valine, leucine and isoleucine biosynthesis | 13                         | 9                               | 0.011               | 0.079                            | 1.869      |
| Propanoate metabolism                       | 18                         | 9                               | 0.011               | 0.079                            | 1.786      |
| Glycerolipid metabolism                     | 16                         | 6                               | 0.011               | 0.079                            | 1.604      |
| Arachidonic acid metabolism                 | 10                         | 2                               | 0.014               | 0.087                            | 1.473      |

404

405

406 **DISCUSSION**

407

408 Here, we measured key overwintering physiological traits in *Pieris rapae* pupae exposed to acute  
409 and chronic winter warming. We support the prediction that winter warming modifies the  
410 intrinsic physiological mechanisms that underlie supercooling, as our experimental results  
411 demonstrated warming-induced shifts in supercooling point that were accompanied by shifts in  
412 the metabolomic signatures of cryoprotection and other metabolic pathways. Because  
413 supercooling allows for the survival of temperate insects through sub-zero winter temperatures,  
414 winter warming threatens overwintering insects by raising their supercooling points. However,  
415 we also report variation among populations in supercooling that matches the historical thermal  
416 environment, which may reflect local adaptation between disparate populations of *P. rapae* from  
417 Vermont and North Carolina. Thus, there is likely to be standing genetic variation in  
418 supercooling, upon which natural selection can act, which we predict will lead to evolutionary  
419 responses in supercooling to future winter warming conditions.

420

### 421 **Warming-induced changes in supercooling point**

422 We show that winter warming impaired supercooling—a key mechanism of cold tolerance.  
423 Strikingly, on Day 50, individuals from both warmed treatments had significantly higher  
424 supercooling points than control individuals. Elevated supercooling points for warmed  
425 individuals at Day 50 may represent the reprioritization of stored reserves, as warmed individuals  
426 allocated resources not to further depressing supercooling points at Day 50, but to another  
427 mechanism of diapause physiology, such as energy metabolism and/or stress tolerance (Hahn  
428 and Denlinger, 2011; Kukul et al., 1991). Similarly, increased thermal variability led to  
429 decreased cold hardiness on day 50 in diapausing cabbage root fly pupae, *Delia radicum* (Košťál  
430 and Šimek, 1995). This result, along with the data presented herein, suggests that individuals that  
431 have been in diapause for approximately two months may be particularly sensitive to thermal  
432 variability.

433       Importantly, our results suggest that warming induced changes in supercooling could  
434 threaten the survival of *P. rapae* pupae in nature. Although the observed supercooling points on  
435 day 50 remain relatively low (Day 50 acute warming  $\bar{x} = -19.6 \pm 3.9^\circ\text{C}$  and chronic warming  $\bar{x} =$   
436  $-19.2 \pm 3.1^\circ\text{C}$ ), these supercooling points are within the range of winter temperatures in  
437 Vermont. Thus, the warmed pupae from this study could have easily frozen to death in the wild  
438 if atmospheric temperatures fell below the observed supercooling points. In addition, un-warmed  
439 *P. rapae* pupae from both Vermont and North Carolina exhibited a trend of decreasing  
440 supercooling points through diapause (Fig. 1). Supercooling points in many insect species have  
441 been shown to follow this same trajectory through diapause, which mirrors environmental  
442 temperatures in nature, as winter temperatures decrease from December through February (Bale,  
443 2002; Hodkova and Hodek, 1988; Marshall and Sinclair, 2015; Pullin et al., 1991). But warmed  
444 pupae broke with this trend on day 50 in diapause, which could signify a warming-induced  
445 mismatch between physiology and the environment. Particularly in the case of acute warming  
446 events, winter warming may be punctuated by sudden drops in temperature that fall below an  
447 individual's supercooling point. If winters continue to increase in variation, with extreme  
448 temperatures at both cold and warm ends, this species, as well as other temperate diapausing  
449 insect species, may be unable to survive without rapid adaptation and/or phenotypic plasticity.

450 We note that extrapolating our results to what pupae experience in nature assumes the  
451 direct exposure of diapausing individuals to changes in atmospheric temperatures, which may or  
452 may not be a realistic assumption, depending on snow cover that could insulate insects against  
453 thermal fluctuations (Boychuk et al., 2015; Sinclair, 2001). However, winter warming is  
454 predicted to lead to loss or reduction in snow cover, which would subsequently expose  
455 diapausing individuals to fluctuating temperatures and to a higher number of freeze-thaw events  
456 (Bale and Hayward, 2010).

457 We also acknowledge that supercooling is a mechanism of cold tolerance that is most  
458 critical for species that are freeze avoidant—i.e., species that cannot survive if they experience  
459 internal freezing. Supercooling may or may not be important for overwintering survival in  
460 species that are freeze tolerant—i.e., species that can survive internal freezing. It remains to be  
461 determined whether freeze tolerant species will be challenged by winter warming; however,  
462 thermal acclimation influences cold tolerance in at least some freeze-tolerant insects (Li et al.,  
463 2020; Toxopeus et al., 2019), suggesting that winter warming may also impact species that are  
464 freeze tolerant and not only species that are freeze avoidant, as we have shown here.  
465 Based on previous work (Li et al., 2020) and the results presented herein, it appears that North  
466 American *P. rapae* rely on supercooling as the primary mechanism of coping with extreme low  
467 temperatures during the winter. We report that the supercooling points of pupae from Vermont  
468 and North Carolina exhibited a pattern indicative of local adaptation—supercooling points  
469 matched the average extreme minimum winter temperatures in these locations, respectively. This  
470 correspondence between historic weather data and supercooling points is striking and suggests  
471 that natural selection has shaped the evolution of supercooling. Thus, supercooling is likely to be  
472 important for survival in these populations. Previous studies have also reported divergence of  
473 supercooling among populations of *Pieris rapae* (Li et al., 2020); however, it is important to note  
474 that supercooling point does not necessarily match the local environment. *Pieris rapae* pupae  
475 from London, Ontario, Canada had supercooling points that matched the local environment from  
476 which they were collected—i.e., average SCP was  $-24^{\circ}\text{C}$  and the average extreme minimum  
477 winter temperatures of London, Ontario are  $-23^{\circ}\text{C}$  to  $-20^{\circ}\text{C}$  (Natural Resources Canada,  
478 <http://www.planthardiness.gc.ca/>, accessed February 2020; Li et al., 2020). However, this study  
479 also showed that a population of *P. rapae* from eastern Siberia had a relatively high SCP ( $-$   
480  $9.3^{\circ}\text{C}$ ), despite the harsh winter temperatures characteristic of that region (Li et al., 2020). Not

481 surprisingly, given this high SCP, the Siberian pupae were freeze tolerant (i.e., they did not die  
482 when exposed to temperatures below their SCP), whereas pupae from Ontario were not freeze  
483 tolerant. Thus, *P. rapae* from eastern Siberia possess cold tolerance mechanisms that are distinct  
484 from supercooling. Nonetheless, cold tolerance of Siberian *P. rapae* was influenced by thermal  
485 acclimation, suggesting that mechanisms other than supercooling could be affected by winter  
486 warming scenarios.

487

### 488 **Metabolomes underlie supercooling**

489 To our knowledge, our study represents the broadest survey of the metabolomic basis of  
490 supercooling to date; untargeted metabolomics allowed us to identify more than 14,000  
491 metabolite features and directly correlate metabolite abundances to supercooling point. Our  
492 results reveal three major findings. First, supercooling in *P. rapae* diapausing pupae appears to  
493 be underlined by the abundances of thousands of metabolites, as a large proportion of the  
494 variance (27%) in abundances of metabolites across the whole metabolome and among pupae  
495 significantly correlated to supercooling point. Previous work has established a solid paradigm for  
496 interpreting the relationship between cold tolerance traits and metabolite abundance.

497 Overwintering insects accumulate higher concentrations of key metabolites, or cryoprotectants,  
498 to lower the freezing point of intra- and extra- cellular solutions (Bale, 2002; Storey and Storey,  
499 1988; Storey and Storey, 1991). Thus, it is perhaps not surprising to see correlations between  
500 metabolite abundance and supercooling, though most previous work has focused on  
501 characterizing a handful of candidate molecules. More recently, targeted metabolomics studies  
502 that measure tens-to-hundreds of metabolites simultaneously corroborate the relationship  
503 between metabolite abundance and various cold tolerance traits, including supercooling (Košťál  
504 et al., 2007; Košťál et al., 2011; Lehmann et al., 2018; Michaud and Denlinger, 2007). Our data  
505 provide a broadscale perspective on the key role of the metabolome in setting lower thermal  
506 limits, which extends previous work to implicate the involvement of a wide array of molecular  
507 players.

508 Second, our data confirm the role of cryoprotectants in lowering the supercooling point,  
509 and winter warming caused cryoprotectants to decrease in abundance. Pupae that had the lowest  
510 supercooling points also had the highest abundances of metabolites in pathways involved in the  
511 synthesis of putative cryoprotectants, including  $\beta$ -alanine metabolism, fructose and mannose

512 metabolism, and glycine, serine and threonine metabolism (Fig. 3). Furthermore, warming  
513 caused the abundances of metabolites in these pathways to decrease. In accordance with these  
514 results, putative cryoprotectants that are produced by these pathways—i.e.,  $\beta$ -alanine, sorbitol,  
515 and glycine—were of highest abundance in pupae with the lowest supercooling points (Fig. 4),  
516 and warmed pupae had some of the lowest levels of these compounds, particularly at day 50 in  
517 diapause (Fig. 4). These patterns suggest that the lack of these compounds may have driven the  
518 significantly higher internal freezing temperatures of warmed individuals on day 50 (Figure 1A).  
519 This fits with previous reports because  $\beta$ -alanine, sorbitol, and glycine have been shown to lower  
520 internal freezing point and increase in abundance in response to cold exposure in many insect  
521 species (Michaud et al., 2008; Michaud and Denlinger, 2007; Storey and Storey, 1990). In  
522 addition, sorbitol and glycine have been shown to stabilize macromolecular structures like  
523 proteins (Street et al., 2006; Yancey et al., 1982), suggesting other potential benefits of these  
524 compounds in addition to freezing point depression. An alternative hypothesis on the role of  $\beta$ -  
525 alanine is that it aids in survival at low temperatures by acting as an alternative end-product to  
526 lactic acid in anaerobic metabolism (Denlinger and Lee, 2010). However, this is an unlikely  
527 explanation for our data, as the pattern of abundance of lactate (within the pyruvate metabolism  
528 pathway) across pupae is nearly identical to that of  $\beta$ -alanine—i.e., pupae with the lowest  
529 supercooling points had both higher  $\beta$ -alanine and higher lactate abundance levels relative to  
530 pupae with higher supercooling points.

531 Third, chronic winter warming (+3°C) caused shifts in core metabolic pathways,  
532 suggesting that even subtle changes in temperature cause drastic changes in metabolism during  
533 diapause. Overwhelmingly, warming caused metabolite abundances to decrease; for example,  
534 metabolites within the fructose and mannose metabolism pathway, glycerolipid metabolism  
535 pathway, and pyruvate metabolism pathway were all significantly higher in control individuals  
536 (Fig. 3). Previous work has shown that metabolomes are dynamic, shift throughout diapause, and  
537 respond to temperature (Košťál et al., 2007; Košťál et al., 2011; Lehmann et al., 2018; Michaud  
538 and Denlinger, 2007). We noted shifts in the metabolome through time, as the second main axis  
539 (PC 2), which accounted for approx. 10% of the variation in metabolomic profiles among pupae,  
540 separated day 25 pupae from day 50 and day 75 pupae. But regardless of these metabolomic  
541 shifts that occurred through diapause, many of the changes in metabolomic profiles were induced  
542 by warming, particularly at day 50 in diapause. Moreover, many of the pathways that shifted in

543 response to warming are involved in energy metabolism, such as pyruvate metabolism.  
544 Warming-induced decreases in the metabolites involved in pyruvate metabolism could indicate  
545 alterations in glycolysis or glycogenolysis, suggesting that ATP generating pathways could  
546 respond to winter warming exposure (Denlinger and Lee, 2010). This is of particular concern  
547 because diapausing pupae should be metabolically quiescent (dormant) and able to maintain  
548 stable metabolism throughout diapause. Yet, if warming caused increases in energy metabolism  
549 that led to the decreased abundance of metabolites in ATP generating pathways, then this may  
550 mean that diapausing pupae deplete their energy reserves in response to winter warming. In  
551 addition, the maintenance of cold tolerance during diapause is dependent on the availability of  
552 energy reserves, as fuel sources (lipids, carbohydrates, and amino acids) are also used as anti-  
553 freezing cryoprotectants (Denlinger, 2002; Hahn and Denlinger, 2010; Storey and Storey,  
554 2012). We did not assay total lipid or sugar content, nor did we measure metabolic rates; thus, the  
555 significance of these findings remains unresolved. Nevertheless, the characterization of  
556 energetics in the context of winter warming is likely to be a worthwhile avenue of future  
557 research.

558         Lastly, untargeted metabolomics elucidated patterns of metabolite abundances that we  
559 would not have otherwise seen if we had taken a targeted metabolomics approach. For example,  
560 the arachidonic acid metabolism pathway was the only pathway in which metabolites exhibited  
561 increased abundances in warmed pupae (Fig. 3). The specific function of arachidonic acid in  
562 diapausing *P. rapae* pupae remains to be determined, but based on what is known about the role  
563 of arachidonic acid in hibernating mammals, this result suggests that winter warming may impact  
564 the utilization of energy stores. Arachidonic acid is a long-chain fatty acid that has been shown  
565 to regulate the activity of peroxisome proliferator-activated receptor  $\alpha$ , a protein involved in  
566 mobilizing lipid stores (Wu et al., 2001) and a key regulator of lipid metabolism upon entrance  
567 into hibernation in ground squirrels, *Spermophilus tridecemlineatus* (Buck et al., 2002).  
568 Functional data on arachidonic acid in insects is lacking; thus, the potential role of arachidonic  
569 acid in regulating energetic processes during diapause remains obscure. It has been shown that  
570 arachidonic acid is a key polyunsaturated fatty acid in the cellular membrane phospholipids of  
571 *Manduca sexta* (Ogg et al., 1991) and arachidonic acid is down-regulated in diapausing pupae of  
572 the flesh fly (*Sarcophaga crassipalpis*) following acute cold stress (Michaud and Denlinger,

573 2006). But, future study is needed to unravel the potential role of arachidonic acid in the context  
574 of diapause and environmental change in insects.

575

### 576 **Winter warming: good or bad?**

577 Whether winter warming will benefit or hinder overwintering organisms is currently under  
578 debate. Some research argues that warmer winter temperatures will result in beneficial effects on  
579 temperate species, as these warmer patterns could lead to increased survival, decreased cold-  
580 induced stress, and the ability to expand geographic ranges (Crozier, 2003). Cold stress lowers  
581 survival in ectothermic organisms; thus, the predicted 1°C-5°C increase in winter temperatures  
582 could increase survival through winter (Bale and Hayward, 2010). Although this prediction may  
583 be true for some species, based upon the data we present herein, not all overwintering organisms  
584 will benefit from winter warming. In *Pieris napi*, previous research has shown that chilling and  
585 cold temperatures are needed for endogenous diapause to maintain its developmental trajectory  
586 and to progress to post-diapause quiescence for spring emergence (Lehmann et al., 2017;  
587 Posledovich et al., 2015). One consequence of warming could be the lack of this transition into  
588 post-diapause development, leading to a longer diapause state, with cascading consequences.  
589 Anecdotally, in our study, warmed individuals had decreased eclosion success relative to control  
590 individuals (unpublished data); thus, supporting these predictions.

591 One advantage of winter warming may be the earlier spring emergence of insects,  
592 including many butterfly and bee species (Bartomeus et al., 2011; Bosch, 2003); however, this  
593 phenomenon has potentially negative effects if it causes asynchrony with insects' host plants or  
594 if individuals experience severe environmental conditions post-emergence. It is more likely that  
595 warming will lead to entire shifts in the diapause program, including delays to diapause entry,  
596 decoupling of environmental cues (temperature and photoperiod) that maintain diapause, and/or  
597 the elimination of diapause completely (Bale and Hayward, 2010; Hodek and Hodkova, 1988).  
598 Studying diapause and other overwintering programs presents an opportunity to not only  
599 understand developmental biology across seasons, but to better predict the future of  
600 overwintering organisms as seasonal variation increases (Denlinger, 2008; Sinclair et al., 2003).

601

602

603



604 **CONCLUSION**

605

606 Our study provides a molecular physiological perspective on the effects of temperature on the  
607 physiology of overwintering insects, thus providing insights into the challenges that species may  
608 endure as global winter temperatures increase and fluctuate with climate change. Future research  
609 exploring the effects of winter warming on overwintering organisms should address not only the  
610 direct effects of warming on physiological mechanisms and maintenance, as measured here, but  
611 also pre and post-winter development and subsequent reproductive success in the spring.  
612 Furthermore, research should focus on exposing populations to both local warming patterns and  
613 reciprocal transplant experiments to better understand population-level responses. This will  
614 allow us to better predict the adaptive potential of populations of conspecifics. Such work will  
615 further our understanding of how winter warming will alter overwintering strategies.

616

617 Acknowledgments

618 We thank Caitlin Decara, Hannah Lewis, and Grace Seta for butterfly collections and larval stage  
619 husbandry. We thank Amy Boyd and her students at Warren Wilson College for North Carolina  
620 butterfly collections. We thank the University of Florida Southeast Center for Integrated  
621 Metabolomics facility for processing the metabolomics samples. We thank Alison Brody, Ingi  
622 Agnarsson, Sumaetee Tangwancharoen, and Thomas O'Leary for helpful comments on this  
623 manuscript. This work was supported by the University of Vermont.

624

625 Competing interests

626 The authors declare no competing or financial interests.

627

628 Author contributions

629 E.E.M conducted the experiment. E.E.M and B.L.L performed data analysis and wrote the  
630 manuscript.

631

**REFERENCES**

**Allen, M., Antwi-Agyei, P., Aragon-Durand, F., Babiker, M., Bertoldi, P., Bind, M., Brown, S., Buckeridge, M., Camilloni, I. and Cartwright, A.** (2019). Technical Summary: Global Warming of 1.5° C. An IPCC Special Report on the Impacts of Global Warming of 1.5° C above Pre-Industrial Levels and Related Global Greenhouse Gas Emission Pathways, in the Context of Strengthening the Global Response to the Threat of Climate Change, Sustainable Development, and Efforts to Eradicate Poverty). Intergovernmental Panel on Climate Change (in Press).

**Bale, J. S.** (2002). Insects at low temperature: from molecular biology to distributions and abundance. *J. Insect Physiol.* **33**, 899-908.

**Bale, J. S. and Hayward, S. A. L.** (2010). Insect overwintering in a changing climate. *J. Exp. Biol.* **213**, 980-994.

**Bartomeus, I., Acher, J. S., Wagner, D., Danforth, B. N., Colla, S., Kornbluth, S. and Winfree, R.** (2011). Climate-associated phenological advances in bee pollinators and bee-pollinated plants. *Proc. Natl. Acad. Sci. USA.* **108**, 20645- 20649.

**Benjamini, Y. and Hochberg, Y.** (1995). Controlling the false discovery rate: a practical and powerful approach to multiple testing. *Journal of the Royal statistical society: series B (Methodological)* **57(1)**, 289-300.

**Bosch, J. and Kemp, W.P.** (2003). Effect of wintering duration and temperature on survival and emergence time in males of the orchard pollinator *Osmia lignaria* (Hymenoptera: Megachilidae). *Environ. Entomol.* **32**, 711- 716.

**Boyчук, E. C., Smiley, J. Y., Dahlahoff, E. P., Bernard, M.A., Rank, N. E. and Sinclair, B. J.** (2015). Cold tolerance of the montane Sierra leaf beetle, *Chrysomela aeneicollis*. *J. Insect. Physiol.* **81**, 157-166.

**Bradshaw, W. E. and Holzapfel, C. M.** (2010). Insects at not so low temperature: climate change in the temperate zone and its biotic consequences. In *Low Temperature Biology of Insects* (eds. D. L. Denlinger and R. E. Lee, Jr), pp. 242-275. Cambridge, New York Cambridge University Press.

**Buck, M. J., Squire, T. L. and Andrews, M. T.** (2002). Coordinate expression of the PDK4 gene: a means of regulating fuel selection in a hibernating mammal. *Physiol. Genomics* **8**, 5–13.

- Buckley, L.B., Arakaki, A.J., Cannistra, A.F., Kharouba, H.M. and Kingsolver, J.G.** (2017). Insect Development, Thermal Plasticity and Fitness Implications in Changing, Seasonal Environments. *Int. Comp. Biol.* **57**, 988–998.
- Chong, J., Wishart, D.S. and Xia, J.** (2019). Using MetaboAnalyst 4.0 for comprehensive and integrative metabolomics data analysis. *Current Protocols in Bioinformatics* **68**, e86.
- Coleman P. C., Bale, J. S. and Hayward, S. A. L.** (2014). Cross-generation plasticity in cold hardiness is associated with diapause, but not the non-diapause developmental pathway, in the blow fly *Calliphora vicina*. *J. Exp. Biol.* **217**, 1454–1461.
- Colinet, H., Sinclair, B. J., Vernon, P. and Renault D.** (2015). Insects in fluctuating thermal environments. *Annu. Rev. Entomol.* **60**, 123-140.
- Crozier, L.** (2003). Winter warming facilitates range expansion: cold tolerance of the butterfly *Atalopedes campestris*. *Oecologia* **135**, 648-656.
- Denlinger, D. L.** (2002). Regulation of diapause. *Ann. Rev. Entomol.* **47**, 93-122.
- Denlinger, D. L. and Lee, R. E. J.** (2010). *Low Temperature Biology of Insect*. Cambridge: Cambridge University Press.
- García-Robledo, C., Kuprewicz, E. K., Staines, C. L., Erwin, T. L. and Kress, W. J.** (2016). Limited tolerance by insects to high temperatures across tropical elevational gradients and the implications of global warming for extinction. *PNAS* **113(3)**, 680-685.
- Hahn, D. A. and Denlinger, D. L.** (2007). Meeting the demands of insect diapause: Nutrient storage and utilization. *J. Insect. Physiol.* **53**, 760-773.
- Hahn, D. A. and Denlinger, D. L.** (2011). Energetics of insect diapause. *Annu. Rev. Entomol.* **56**, 103-121.

**Hodek, I. and Hodková, M.** (1988). Multiple roles of temperature during insect diapause a review. *Entomologia Experimentalis et Applicata*. **49**, 153-165.

**Kingsolver, J. G., Woods, H. A., Buckley, L. B., Potter, K. A., MacLean, H. and Higgins, J. K.** (2011). Complex life cycles and the responses of insects to climate change. *Int. and Comp. Biol.* **51**, 719-732.

**Košťál, V. and Šimek, P.** (1995). Dynamics of cold hardiness, supercooling and cryoprotectants in diapausing and non-diapausing pupae of the cabbage root fly, *Delia radicum* L. *J. Insect Physiol.* **41**, 627-634

**Košťál, V., Zahradnickova, H., Šimek P. and Zeleny, J.** (2007). Multiple component system of sugars and polyols in the overwintering spruce bark beetle, *Ips typographus*. *J. Insect Physiol.* **53**, 580–586.

**Košťál, V., Dolezal, P., Rozsypal, J., Moravcova, M., Zahradnickova, H. and Šimek P.** (2011). Physiological and biochemical analysis of overwintering and cold tolerance in two Central European populations of the spruce bark beetle, *Ips typographus*. *J. Insect Physiol.* **57**, 1136–1146.

**Kukal, O., Denlinger, D.L. and Lee, R.E.** (1991). Developmental and metabolic changes induced by anoxia in diapausing and nondiapausing flesh fly pupae. *J. Comp. Physiol.* **160**, 683–8967.

**Li, S., Park, Y., Duraisingham, S., Strobel F. H., Khan N., Soltow, Q.A., Jones, D.P. and Pulendran, B.** (2013) Predicting Network Activity from High Throughput Metabolomics. *PLoS Comput Biol* **9**(7), e1003123.

**Li, N. G., Toxopeus, J., Moos, M., Sørensen, J. G. and Sinclair, B. J.** (2020). A comparison of low temperature biology of *Pieris rapae* from Ontario, Canada, and Yakutia, Far Eastern Russia. *Comp. Biochem. Physiol. A Mol. Integr. Physiol.* **242**, 110649.

**Lee, R. E.** (2010). A primer on insect cold tolerance. In: Denlinger, D. L. and Lee, R. E. J. (Eds.), *Low Temperature Biology of Insects*. Cambridge University Press, New York, 3-34.

**Lehmann, P., Pruisscher, P., Posledovich, D., Carlsson, M., Käkälä, R., Tang, P., Nylin, S., Wheat, C. W., Wiklund, C. and Gotthard, K.** (2016). Energy and lipid metabolism during direct and diapause development in a pierid butterfly. *J. Exp. Biol.* **219**, 3049-3060.

**Lehmann, P., Pruisscher, P., Košťál, V., Moos, N., Šimek, P. Nylin, S., Agren, R., Väre, M., Wiklund, C., Wheat, C. W. and Gotthard, K.** (2018). Metabolome dynamics of diapause in the butterfly *Pieris napi*: distinguishing maintenance, termination, and post-diapause phases. *J. Exp. Biol.* **221**, 1-9.

**Marshall, K. E. and Sinclair, B. J.** (2015). The relative importance of number, duration and intensity of cold stress events in determining survival and energetics of an overwintering insect. *Funct. Ecol.* **29**, 357-366.

**Michaud, M. R. and Denlinger, D. L.** (2006). Oleic acid is elevated in cell membranes during rapid cold-hardening and pupal diapause in the flesh fly, *Sarcophaga crassipalpis*. *J. Insect Physiol.* **52**, 1073–1082.

**Michaud, M. R. and Denlinger, D. L.** (2007). Shifts in carbohydrate, polyol, and amino acid pools during rapid cold-hardening and diapause associated cold-hardening in flesh flies (*Sarcophaga crassipalpis*): a metabolomic comparison. *J. Comp. Physiol.* **177**, 753-763.

**Michaud, M. R., Benoit, J. B., Lopez-Martinez, G., Elnitsky, M.A., Lee, R. E. and Denlinger, D. L.** (2008). Metabolomics reveals unique and shared metabolic changes in response to heat shock, freezing, and desiccation in the Antarctic midge, *Belgica antarctica*. *J. Insect Physiol.* **54**, 645-655.

**Ogg, C. L., Howard, R. W. and Stanley-Samuelson, D. W.** (1991). Fatty acid composition and incorporation of arachidonic acid into phospholipids of hemocytes from the tobacco hornworm *Manduca sexta*. *Insect Biochem.* **21**, 809–814.

**Posledovich, D., Toftegaard, T., Wiklund, W., Ehrlén, J. and Gotthard, K.** (2015). Latitudinal variation in diapause duration and post-winter development in two pierid butterflies in relation to phenological specialization. *Oecologia* **177**, 181-190.

**Pullin, A. S., Bale, J. S. and Fontaine, X. L. R.** (1991). Physiological aspects of diapause and cold tolerance during overwintering in *Pieris brassica*. *Physiol. Entomol.* **16**, 447-456.

**Ryan, S. F., Lombaert, E., Espeset, A., Vila, R., Talavera, G., Dinca, V., Doellman, M. M., Renshaw, M. A., Eng, M. W. and Hornett E. A.** (2019). Global invasion history of the agricultural pest butterfly *Pieris rapae* revealed with genomics and citizen science. *Proc. Natl. Acad. Sci. U. S.A.* **116**, 20015-20024.

**Salt, R. W.** (1961). Principles of insect cold hardiness. *Ann. Rev. Entomol.* **6**: 55-74.

**Saunders, D. S.** (1971). The temperature-compensated photoperiodic clock “programming” development and pupal diapause in the flesh-fly, *Sarcophaga argyrostoma*. *J. Insect Physiol.* **17**, 801-812.

**Sformo, T., Walters, K., Jeannet, K., Wowk, B., Fahy, G. M., Barnes, B. M. and Duman, J. G.** (2010). Deep supercooling, vitrification and limited survival to -100°C in the Alaskan beetle *Cucujus clavipes puniceus* (Coleoptera: Cucujidae) larvae. *J. Exp. Biol.* **213**, 502–509.

**Sgolastra, F., Kemp, W. P., Buckner, J. S., Pitts-Singer, T. L., Maini, S. and Bosch, J.** (2011). The long-summer: Pre-wintering temperatures affect metabolic expenditure and winter survival in a solitary bee. *J. Insect Physiol.* **57**, 1651-1659.

**Sinclair, B. J.** (2001). Field ecology of freeze tolerance: interannual variation in cooling rates, freeze-thaw and thermal stress in the microhabitat of the alpine cockroach *Celatoblatta quinquemaculata*. *Oikos* **93**, 286–293.

**Sinclair, B. J., Vernon, P, Klok, C. J. and Chown, S. L.** (2003). Insects at low temperatures: an ecological perspective. *Trends in Ecology & Evolution* **18**, 257–262.

**Sinclair, B. J.** (2015). Linking energetics and overwintering in temperate insects. *J. Thermal Biol.* **54**, 5-11.

**Sinclair, B. J., Coello Alvarado, L. E. and Ferguson, L. V.** (2015). An invitation to measure insect cold tolerance: Methods, approaches, and workflow. *J. Thermal Biol.* **43**: 180-197.

**Sinclair, B. J., Marshall, K. E., Sewell, M. A., Levesque, D. L., Willett, C. S., Slotsbo, S., Dong, Y., Harley, C. D. G., Marshall, D. J., Helmuth, B. S. and Huey, R. B.** (2016). Can we predict ectotherm responses to climate change using thermal performance curves and body temperatures? *Ecology Letters.* **19**, 1372-1385.

**Somero, G. N.** (2010). The physiology of climate change: how potentials for acclimatization and genetic adaptation will determine 'winners' and 'losers'. *J. Exp. Biol.* **213(6)**, 912–920.

**Somero, G. N., Lockwood, B. L. and Tomanek, L.** (2017). Temperature. In *Biochemical adaptation: Response to environmental challenges from life's origins to the Anthropocene*. pp.298. Sunderland, MA. Sinauer Associates.

**Storey, K. B. and Storey, J. M.** (1988). Freeze tolerance in animals. *Physiol. Rev.* **68**, 27–84.

**Storey, K. B. and Storey, J. M.** (1990). Biochemistry of cryoprotectants. In *Insects at Low Temperature* (ed. R. E. J. Lee and D. L. Denlinger), pp. 64-94. New York: Chapman and Hall.

**Storey, K. B. Heldmaier, G. and Rider, M. H.** (2010). Mammalian Hibernation: Physiology, Cell Signaling, and Gene Controls on Metabolic Rate Depression. In *Dormancy and Resistance in Harsh Environments* (ed. Lubzens, E.), Cerda, J.), and Clark, M.), pp. 227–252. Berlin, Heidelberg: Springer Berlin Heidelberg.

**Storey, K. B. and Storey, J. M.** (2012). Insect cold hardiness: Metabolic, gene, and protein adaptation. *Can. J. Zool.* **90**, 456-475.

**Street, T. O. Bolen, D. W., and Rose, G. D.** (2006). A molecular mechanism for osmolyte-induced protein stability. *Proc. Natl. Acad. Sci. U. S. A.* **103**, 13997–14002.

**Tauber, M. J. and Tauber, C. A.** (1978). Evolution of phenological strategies in insects: A comparative approach with eco-physiological and genetic considerations. In *Evolution of insect migration and diapause* (ed. H. Dingle). pp. 53-71. Springer-Verlag, New York.

**Toxopeus, J., Košťál, V. and Sinclair, B. J.** (2019). Evidence for non-colligative function of small cryoprotectants in a freeze-tolerant insect. *Proc. Roy. Soc. B. Biol. Sci.* **286**, 20190050.

**Williams, C. M., Marshall, K. E., MacMillan, H. A., Dzurisin, J. D. K., Hellmann, J. and Sinclair, B. J.** (2012). Thermal variability increases the impact of autumnal warming and drives metabolic depression in an overwintering butterfly. *PLOS ONE* **7**(3), e34470.

**Wu, P., Peters, J. M. and Harris, R. A.** (2001). Adaptive increase in pyruvate dehydrogenase kinase 4 during starvation is mediated by peroxisome proliferator-activated receptor alpha. *Biochem. Biophys. Res. Commun.* **287**, 391–396.

**Yancey, P. H., Clark, M. E., Hand, S. C., Bowlus, R. D. and Somero, G. N.** (1982). Living with water stress: evolution of osmolyte systems. *Science* **217**, 1214–1222.
